# Supplementary material for: Exogenous Abscisic Acid Affects the Heat Tolerance of Rice Seedlings by Influencing the Accumulation of ROS
Source: MDPI journal article supplement (doi:10.3390/antiox12071404), 2023-07-09
Supplement: s1 [file s1]

Table S1. The list of RT-qPCR primer pairs.

| Primer name | Sequence (5'–3')          | MSU_Locus      |
|-------------|---------------------------|----------------|
| OsACTIN1-F  | GACCTTCAACACCCCTGCTA      | LOC_Os03g50885 |
| OsACTIN1-R  | GAGTCCAACACAATACCTGTGG    |                |
| CHLH-F      | AACTGGATGAGCCAGAAGAGA     | LOC_Os03g20700 |
| CHLH-R      | AAATGCAAAAGACTTGCGACT     |                |
| HEMA-F      | CGCTATTTCTGATGCTATGGGT    | LOC_Os10g35840 |
| HEMA-R      | TCTTGGGTGATGATTGTTTGG     |                |
| PORA-F      | ATGGCTCTCCAAGTTCAG        | LOC_Os04g58200 |
| PORA-R      | TGGCTCACGCTAAGGAAC        |                |
| PORB-F      | CCGCAAGGAGGGAGCGGTG       | LOC_Os10g35370 |
| PORB-R      | CCCTCTTGGTGCTAAGGCCG      |                |
| OsFe-SOD-F  | CTTGATGCCCTGGAACCTTA      | LOC_Os06g05110 |
| OsFe-SOD-R  | GCCAGACCCCAAAAGTGATA      |                |
| OsCATB-F    | GTTCCGGTTCTCCACAGTCGT     | LOC_Os06g51150 |
| OsCATB-R    | CCCTCCATGTGCCTGTAGTT      |                |
| OsHSP70-F   | GCCAAGCGTCAAGCAGTGACCAA   | LOC_Os03g02260 |
| OsHSP70-R   | GGTCATCAAAGCGCCGCCCTAT    |                |
| OsHSP90-F   | TTTGGGCGAAGGTGACACTGCTA   | LOC_Os06g50300 |
| OsHSP90-R   | TGGCAATGGTCCCAAGGTTCTTAAT |                |
| OsHsfA2d-F  | CAAGAGATGATGCTGGGATTCC    | LOC_Os03g06630 |
| OsHsfA2d-R  | CTATTGCTTAGATAACCCAGCT    |                |
| OsDREB2A-F  | GGAATCTCCTCCTTTCATCGTG    | LOC_Os01g07120 |
| OsDREB2A-R  | TTCCGCTCCTGACAAACACG      |                |
| OsLEA3- F   | GCAGTACACCAAGGACTCTGC     | LOC_Os05g46480 |
| OsLEA3- R   | ACCCAAAGGGAAATCATTAC      |                |
| SNAC1-F     | CATGGTCCCGTTCTGAGGTG      | LOC_Os03g60080 |
| SNAC1-R     | CACACGTTGCAGCATCGATC      |                |
| OsZIP23-F   | GGAGCTGAACGATGAACTCCAG    | LOC_Os02g52780 |
| OsZIP23-R   | TCGGCTCATTCTCTCTAGAACCTC  |                |
| OsZIP72-F   | AAGAGACTTTGCTTGCGAAGAAC   | LOC_Os09g28310 |
| OsZIP72-R   | TGATGAAGGTGGGAATTGCA      |                |
| OsABI5- F   | GAAGAATTCCAGGCTACCACC     | LOC_Os01g64000 |
| OsABI5- R   | TTGATCTCAGTCCACACCTCC     |                |
| OsAREB1-F   | TGAGGTGGCAAACTGAAGGA      | LOC_Os06g10880 |
| OsAREB1-R   | CTGTATCATTTCCACCTGCTTTTTC |                |
| SAPK10-F    | TCTTGACGTGGAAAGCAGTG      | LOC_Os03g41460 |
| SAPK10-R    | TCCACTTCCCAGTTTCTTGG      |                |
| OsABIL1-F   | GATGGTCTCTGGGACGTCAT      | LOC_Os01g40094 |
| OsABIL1-R   | CTTCGACAAGCACTCAGCAG      |                |

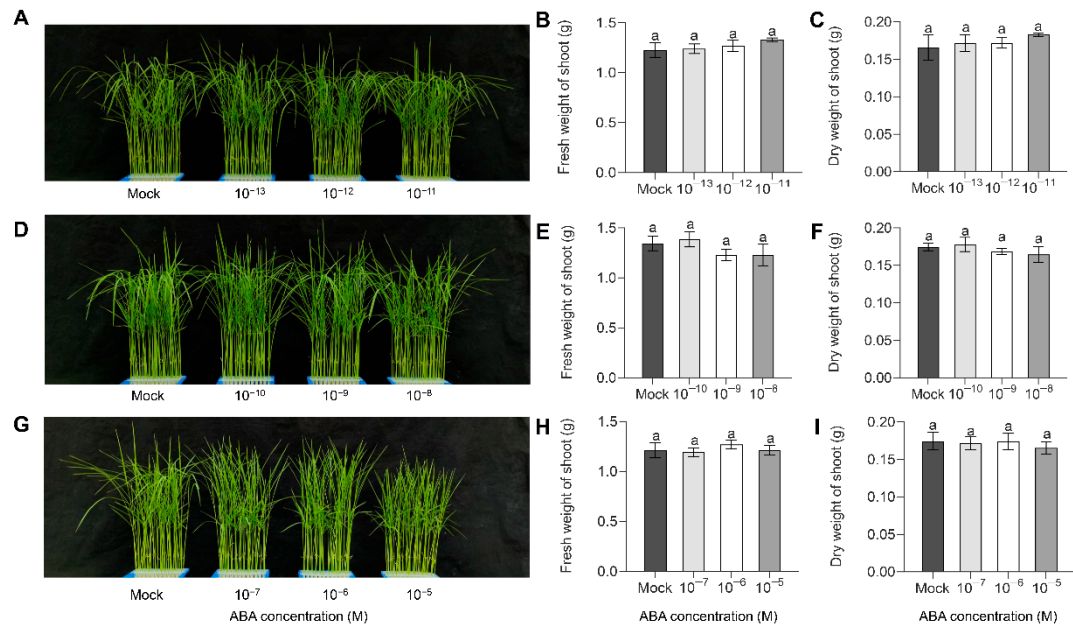

**Figure S1.** Effect of exogenous application of different concentrations of ABA on the fresh and dry weight of seedlings under controlled conditions.

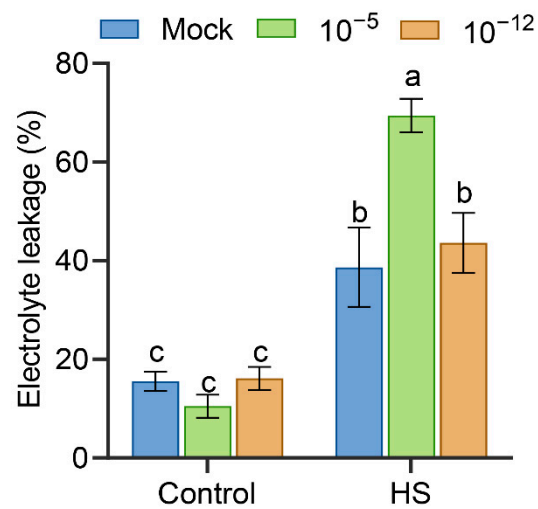

**Figure S2.** Electrolyte leakage rates in mock,  $10^{-5}$  M ABA-treated, and  $10^{-12}$  M ABA-treated seedlings after 30 h of  $45^{\circ}\text{C}$  treatment.
